# Supplementary material for: Surrounded by Kindred: Spermophilus major Hybridization with Other Spermophilus Species in Space and Time
Source: MDPI journal article supplement (doi:10.3390/biology12060880), 2023-06-17
Supplement: s1 [file s1]

# Surrounded by kindred: *Spermophilus major* hybridization with other *Spermophilus* species in space and time

Andrey Tukhbatullin, Oleg Ermakov, Svetlana Kapustina, Vladimir Starikov, Valentina Tambovtseva, Sergey Titov, and Oleg Brandler

## Supplementary Materials

**Table S2:** The primers and amplification reaction conditions.

| Markers               | Pramers |                                   | Denaturation |      | Annealing |       | Extension |         | Number of cycles | References |
|-----------------------|---------|-----------------------------------|--------------|------|-----------|-------|-----------|---------|------------------|------------|
|                       | Name    | Sequence                          | t° C         | time | t° C      | time  | t° C      | time    |                  |            |
| mtDNA                 |         |                                   |              |      |           |       |           |         |                  |            |
| CR PCR                | MDL1    | TCCACCTTCAACTCCCAAAGC+M13F*       | 95           | 30 s | 58        | 45 s  | 72        | 1 min   | 35               | [49]       |
|                       | H00651  | TAACTGCAGAAGGCTAGGACCAAACCT+M13R* |              |      |           |       |           |         |                  | [98]       |
| Cytb PCR              | L14725  | TGAAAAAYCATCGTTGT+M13F*           | 95           | 30 s | 48        | 40    | 72        | 1 min   | 35               | [99]       |
|                       | H15915  | TCTTCATTTYWGGTTTACAAGAC+M13R*     |              |      |           |       |           |         |                  | [100]      |
| Sequencing reaction   | M13F    | TGTAAAACGACGGCCAGT                |              |      |           |       |           |         |                  | [101]      |
|                       | M13R    | CACAGGAAACAGCTATGACC              |              |      |           |       |           |         |                  |            |
| nDNA                  |         |                                   |              |      |           |       |           |         |                  |            |
| 8iSmcY                | Smc8D   | ATGCTCTCGTGGGGATGAAG              | 95           | 20 s | 56.3      | 40    | 72        | 20 s    | 35               | [53]       |
|                       | Smc9R   | ACAGGCATGTTGAAGTAGTC              |              |      |           |       |           |         |                  |            |
| BGN                   | BGN-f   | CTCCAAGAACCACCTGGTG               | 95           | 40 s | 61        | 50 s  | 72        | 50 s    | 35               | [66]       |
|                       | BGN-r   | TTCAAAGCCACTGTTCTCCAG             |              |      |           |       |           |         |                  |            |
| PRKCI                 | PRKCI-f | GGGTAATAGGAAGAGGAAGTT             | 95           | 40 s | 54        | 50 s  | 72        | 50 s    | 35               | [67]       |
|                       | PRKCI-r | CCAACAAGGAAAGGATGAT               |              |      |           |       |           |         |                  |            |
| c-mic                 | S91     | RRAGCCTCATTAAGTCTTAGGTAAGAA       | 95           | 45 s | 60        | 45 s  | 72        | 1.5 min | 37               | [69]       |
|                       | S92     | CCMAAGACYCAGCCAAGGTTGTGAGGT       |              |      |           |       |           |         |                  |            |
| rejected nDNA markers |         |                                   |              |      |           |       |           |         |                  |            |
| GBA                   | GBA-f   | AAAAGCTTCGGCTACAGCTC              | 95           | 40 s | 56        | 1 min | 72        | 50 s    | 35               | [66]       |
|                       | GBA-r   | TCCCTTCACTTTCTGGAAGCTC            |              |      |           |       |           |         |                  |            |
| BCR                   | SMD1    | CACATTCCACTGACCATCAAC             | 95           | 30 s | 60        | 50 s  | 72        | 1 min   | 30               | [25]       |
|                       | D3      | AGTGGCTGAGTGGACGATGA              |              |      |           |       |           |         |                  |            |
| MGF                   | MGF-f   | ATCCATTGATGCCTTCAAGG              | 95           | 40 s | 56        | 1 min | 72        | 1 min   | 35               | [66]       |
|                       | MGF-r   | CTGTCAATTCTTAAGGGAGCTG            |              |      |           |       |           |         |                  |            |
| THY                   | THY-f   | CATCAACACCACCATCTGTGC             | 95           | 40 s | 49        | 1 min | 72        | 1 min   | 35               | [68]       |
|                       | THY-r   | CACTTGCCACACTTACAGCT              |              |      |           |       |           |         |                  |            |

\* Specific primers were modified in 5' ends with complementing by sequence primers (M13f and M13r) for polymerase chain reaction (PCR).
